# Supplementary material for: Neural effects of multisensory dance training in Parkinson’s disease: evidence from a longitudinal neuroimaging single case study
Source: PubMed Central journal article supplement (PMC11496053; doi:10.3389/fnagi.2024.1398871), 2024-10-09
Supplement: Data_Sheet_1.pdf [file Data_Sheet_1.pdf]

**Table S1.** Dance for Parkinson's class sample routine. The exact structure and content of the classes varied over the 8-month training period, but the choreography tested in the fMRI protocol was always practiced at the end of each class.

| Part     | Description                                                                                                                                                                                                                                                                                                                                          |
|----------|------------------------------------------------------------------------------------------------------------------------------------------------------------------------------------------------------------------------------------------------------------------------------------------------------------------------------------------------------|
| Opening  | Participants introduced themselves by stating names accompanied by a dance movement.                                                                                                                                                                                                                                                                 |
| Warm-up  | Stretching arms and legs as well as knees and ankles to facilitate flexibility and mobility while also strengthening the core.                                                                                                                                                                                                                       |
| Exercise | While seated, participants slowly rise to practice safely rising from a seated position. This is followed by a paired mirror dance, where the participants improvise movements and copy each other. Participants then practice their balance by lunging side to side while holding onto the back of a chair.                                         |
| Dancing  | Participants dance to the triplet rhythm of waltz. Participants also build confidence by performing a seated shuffle dance of gradually increasing expression of dance movements. Finally, participants perform the "Showdown Hoedown" choreography facing a partner, comprising a 2-minute choreography with multiple steps and movement sequences. |

**Table S2.** Talairach coordinates of functionally defined regions of interest. *Note:* SMA = supplementary motor area; STG = superior temporal gyrus.

| Region | Hemisphere | Talairach Coordinates |          |          | Number of voxels | Max stat-value |
|--------|------------|-----------------------|----------|----------|------------------|----------------|
|        |            | <i>x</i>              | <i>y</i> | <i>z</i> |                  |                |
| SMA    |            | -3                    | 6        | 55       | 4535             | 16.071         |
| STG    | Right      | 56                    | -19      | 11       | 8084             | 26.882         |
|        | Left       | -50                   | -24      | 13       | 7895             | 25.750         |
| Insula | Right      | 22                    | 14       | 1        | 605              | 14.245         |
|        | Left       | -32                   | 20       | 5        | 403              | 13.043         |
